# Supplementary material
Source: publisher figshare collection journal article supplement (https://acs.figshare.com/ndownloader/files/12459224)
Supplement: Supplementary file 1 [file 12459224]

# Fabrication of Functional Biomaterial Microstructures by *In situ*

## Photopolymerization and Photodegradation

*Paige J. LeValley<sup>1</sup>, Ben Noren<sup>1</sup>, Prathamesh M. Kharkar<sup>3</sup>, April M. Kloxin<sup>3</sup>, Jesse C. Gatlin<sup>2</sup>, and*

*John S. Oakey<sup>1\*</sup>*

<sup>1</sup> Department of Chemical Engineering, University of Wyoming, Laramie, WY 82071

<sup>2</sup> Department of Molecular Biology, University of Wyoming, Laramie, WY 82071

<sup>3</sup> Department of Biomolecular and Chemical Engineering, University of Delaware, Newark, DE

19716

\* To whom correspondence should be addressed.

\* Email: joakey@uwyo.edu

**Number of pages: 4**

**Number of tables: 2**

## Supplemental Information

The following list of ordinary differential equations were solved simultaneously in the model:

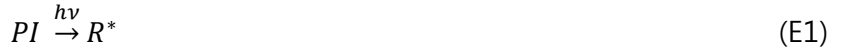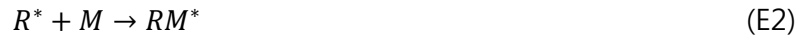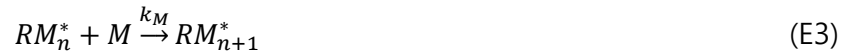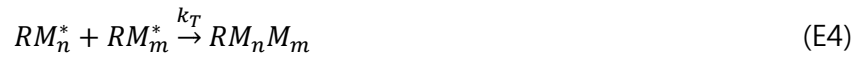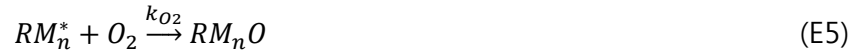

Where PI is the photoinitiator,  $R^*$  is the radical formation, M is the monomer unit, and subscripts

n and m represent the number of repeat units. Equation 1 accounts for the consumption or double bond conversion of the monomer species [M] that drives the polymerization reaction. Equation 2 describes the photoinitiator decomposition which is dependent on the UV light intensity [I] (measured using a radiometer) and the sample depth. The sample depth is assumed to be negligible because all features formed were under 100  $\mu\text{m}$  in depth.

The conversion efficiency is indicated by the quantum yield. The molar absorptivity of protons ( $\epsilon$ ) depends on the initiator used as well as the temperature and wavelength. To convert [I] into moles of photons per unit volume the light wavelength ( $\lambda$ ), Avogadro's

number ( $N_A$ ), Plank's constant ( $h$ ), and speed of light ( $c$ ) are used. The polymerization reaction is inhibited by oxygen which is consumed by scavenging radicals (Equation 3). For the radical rate terms, complex multispecies termination mechanisms are ignored and all radical species are lumped into a single term,  $[R]$ . The balance of radical species is different in the two regions defined. In region 1 radicals are formed by exposure to UV light and can be consumed in either a termination or oxygen inhibition reaction (Equation 4). In region 2 radicals are not being formed only consumed by either monomer termination or oxygen inhibition (Equation 5). The double bond conversion factor,  $\xi$ , is used to evaluate hydrogel polymerization or gelation. Full gelation of the hydrogel solution occurs at a double bond conversion fraction of 0.01 or higher.<sup>1,2</sup>

**Table S1.** Variables used in COSMOL model.

| Variable  | Definition                                             | Value                                      | Source   |
|-----------|--------------------------------------------------------|--------------------------------------------|----------|
| $r_1$     | radius of first region                                 | 12.5 $\mu\text{m}$                         | measured |
| $D_{O_2}$ | diffusion of oxygen through particle                   | $1 \times 10^{-10} \text{ m}^2/\text{s}$   | 3        |
| $D_M$     | diffusion of monomer into surrounding solution         | $1 \times 10^{-10} \text{ m}^2/\text{s}$   | 1        |
| $D_{PI}$  | diffusion of photoinitiator into surrounding solution  | $2 \times 10^{-10} \text{ m}^2/\text{s}$   | 1        |
| $D_R$     | diffusion of radical species into surrounding solution | $1 \times 10^{-10} \text{ m}^2/\text{s}$   | 1        |
| $k_{O_2}$ | oxygen inhibition consumption rate constant            | $2 \times 10^5 \text{ m}^3/(\text{s mol})$ | 2        |

|                    |                                         |                              |             |
|--------------------|-----------------------------------------|------------------------------|-------------|
| $k_M$              | monomer conversation rate constant      | 100 m <sup>3</sup> /(s mol)  | 1           |
| $k_T$              | termination rate constant rate constant | 2500 m <sup>3</sup> /(s mol) | 1           |
| $\varphi$          | quantum yield                           | 0.60                         | 1           |
| $\lambda$          | wavelength                              | 365 nm                       | lens filter |
| $\varepsilon$      | molar absorptivity of protons at 365 nm | 21.8 m <sup>2</sup> /mol     | 4           |
| [I]                | UV light intensity                      | 200 mW/cm <sup>2</sup>       | measured    |
| [M <sub>0</sub> ]  | initial concentration of monomer        | 320 mol/m <sup>3</sup>       | measured    |
| [PI <sub>0</sub> ] | initial concentration of photoinitiator | 183.7 mol/m <sup>3</sup>     | measured    |
| [O <sub>20</sub> ] | initial concentration of oxygen         | 0.50 mol/m <sup>3</sup>      | measured    |

**Table S2:** Light intensities reported in mW cm<sup>-2</sup> for objectives and wavelengths used.

|     | 365 nm | 405 nm |
|-----|--------|--------|
| 20x | 407    | 355    |
| 40x | 383    | 321    |

## References

- (1) Dendukuri, D.; Panda, P.; Kim, J. M.; Hatton, T. A.; Doyle, P. S.; Haghgooie, R. Modeling of Oxygen-Inhibited Free Radical Photopolymerization in a PDMS Microfluidic Device. *Macromolecules* **2008**, *41*, 8547–8556 DOI: 10.1021/ma801219w.
- (2) Krutkramelis, K.; Xia, B.; Oakey, J. Monodisperse polyethylene glycol diacrylate hydrogel microsphere formation by oxygen-controlled photopolymerization in a microfluidic device. *Lab Chip* **2016**, *16*, 1457–1465 DOI: 10.1039/C6LC00254D.
- (3) O'Brien, A. K.; Bowman, C. N. Impact of Oxygen on Photopolymerization Kinetics and Polymer Structure. *Macromolecules* **2006**, *39* (7), 2501–2506 DOI: 10.1021/ma051863l.
- (4) Jariwala, A. S.; Ding, F.; Boddapati, A.; Breedveld, V.; Grover, M. A.; Henderson, C. L.; Rosen, D. W. Modeling effect of oxygen inhibition in mask-based stereolithography. *Rapid Prototyp. J.* **2011**, *17* (3), 168–175 DOI: 10.1108/13552541111124734.
